# Supplementary material
Source: publisher site journal article supplement (http://www.kjim.org/upload/media/kjim-2020-636-suppl2.pdf)
Supplement: Supplementary file 1 [file kjim-2020-636-suppl2.pdf]

**Supplementary Table 2. Univariate and multivariate analyses for overall survival in 362 patients in age < 70**

| Characteristic                | Univariate       |                | Multivariate     |                |
|-------------------------------|------------------|----------------|------------------|----------------|
|                               | HR (95% CI)      | <i>p</i> value | HR (95% CI)      | <i>p</i> value |
| <b>Gender</b>                 |                  |                |                  |                |
| Male vs. female               | 0.80 (0.46–1.40) | 0.431          |                  |                |
| <b>ECOG PS</b>                |                  |                |                  |                |
| 2–3 vs. 0–1                   | 1.92 (0.77–4.79) | 0.160          |                  |                |
| <b>Smoking history</b>        |                  |                |                  |                |
| Current or former vs. never   | 1.04 (0.63–1.73) | 0.876          |                  |                |
| <b>Alcohol history</b>        |                  |                |                  |                |
| Drink vs. Do not drink        | 1.25 (0.72–2.18) | 0.419          |                  |                |
| <b>HPV status</b>             |                  |                |                  |                |
| Positive vs. Negative         | 0.27 (0.11–0.67) | 0.005          | 0.32 (0.14–0.74) | 0.008          |
| Unknown vs. Negative          | 1.06 (0.65–1.72) | 0.817          |                  |                |
| <b>Primary tumor location</b> |                  |                |                  |                |
| Oropharynx                    | 1 (reference)    |                |                  |                |
| Oral cavity                   | 1.41 (0.84–2.37) | 0.195          |                  |                |
| Hypopharynx                   | 1.92 (1.06–3.50) | 0.032          |                  |                |
| Larynx                        | 0.94 (0.45–1.96) | 0.860          |                  |                |
| Others                        | 1.13 (0.40–3.19) | 0.821          |                  |                |
| T classification              | 1.50 (1.21–1.86) | < 0.001        | 1.36 (1.09–1.70) | 0.006          |
| N classification              | 1.70 (1.22–2.36) | 0.002          | 1.66 (1.22–2.26) | 0.001          |
| <b>Induction chemotherapy</b> |                  |                |                  |                |
| Yes vs. No                    | 1.82 (1.19–2.77) | 0.005          |                  |                |
| <b>Treatment strategy</b>     |                  |                |                  |                |
| CCRT                          | 1 (reference)    |                | 1 (reference)    |                |
| Surgery                       | 0.79 (0.50–1.25) | 0.314          |                  |                |
| Inadequate                    | 2.96 (1.52–5.77) | 0.001          | 2.28 (1.18–4.37) | 0.014          |

HR, hazard ratio; CI, confidence interval; ECOG, Eastern Cooperative Oncology Group; PS, performance status; HPV, human papilloma virus; CCRT, concurrent chemoradiotherapy.
